# Supplementary material for: Functional characterization of the late embryogenesis abundant (LEA) protein gene family from Pinus tabuliformis (Pinaceae) in Escherichia coli
Source: PubMed Central journal article supplement (PMC4726009; doi:10.1038/srep19467), 2016-01-19
Supplement: srep19467-s1.pdf [file srep19467-s1.pdf]

**Manuscript title:** Functional characterization of the late embryogenesis abundant (LEA) protein gene family from *Pinus tabuliformis* (Pinaceae) in *Escherichia coli*

Author: Jie Gao<sup>1\*</sup> and Ting Lan<sup>2</sup>

<sup>1</sup>Key Laboratory of Tropical Forest Ecology, Xishuangbanna Tropical Botanical Garden, Chinese Academy of Sciences, Menglun, Yunnan, China

<sup>2</sup>State Key Laboratory of Systematic and Evolutionary Botany, Institute of Botany, Chinese Academy of Sciences, Beijing 10093, China \*Corresponding to Dr. Jie Gao Phone: +86-691-8713066;

E-mail: [gaojie@xtbg.org.cn](mailto:gaojie@xtbg.org.cn)

### Supporting information

**Supplemental Figure. 1** Weblogo illustration of the conserved motif sequences in *P. tabuliformis* genes.

**Supplemental Figure. 2** Growth performance of *E.coli* transformants for pTWIN-LEA and pTWIN constructs under salt treatment. BP, BL21 cells with TWIN1 vector transformed.

**Supplemental Figure. 3** Growth performance of *E.coli* transformants for TWIN-LEA and TWIN constructs under heat treatment. BP, BL21 cells with TWIN1 vector transformed.

**Supplemental Table 1.** PCR primers used to clone and expression of *LEA* genes in *P. tabuliformis*.

**Supplemental Table 2.** RT-PCR primers used to detect the expression of *LEA* genes.

**Supplemental Table 3.** EX-PCR primers used to expression the *P. tabuliformis* *LEA* genes.

**Supplemental file 4.** The identified 43 protein sequences of *P. taeda*.

motif 1

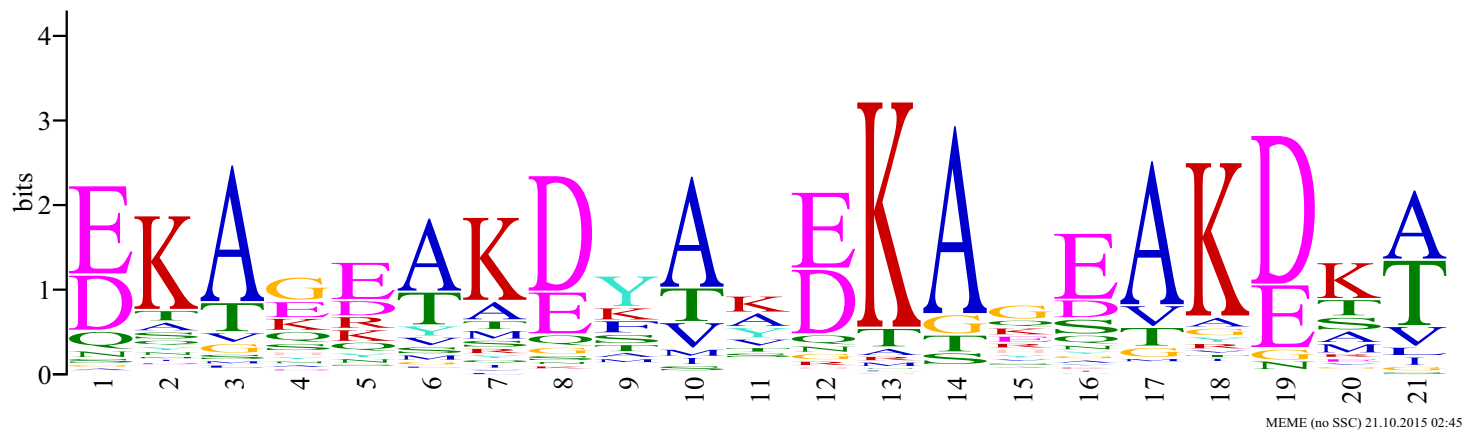

motif 2

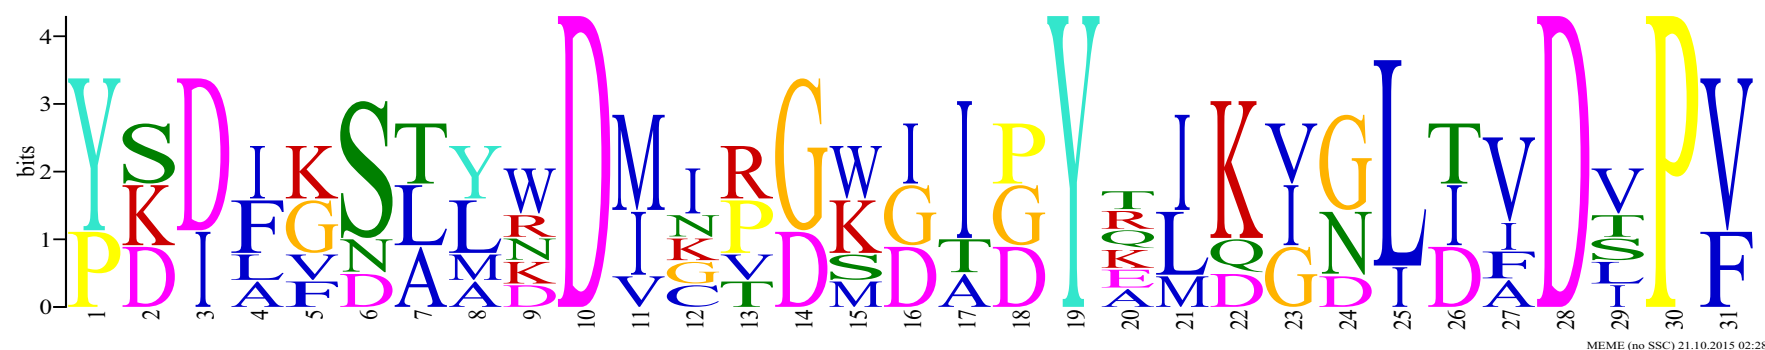

motif 3

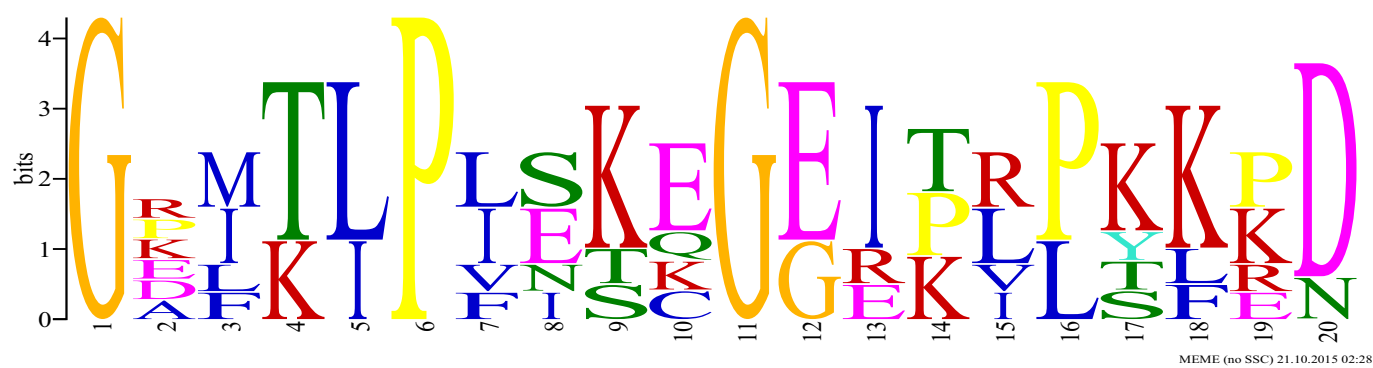

motif 4

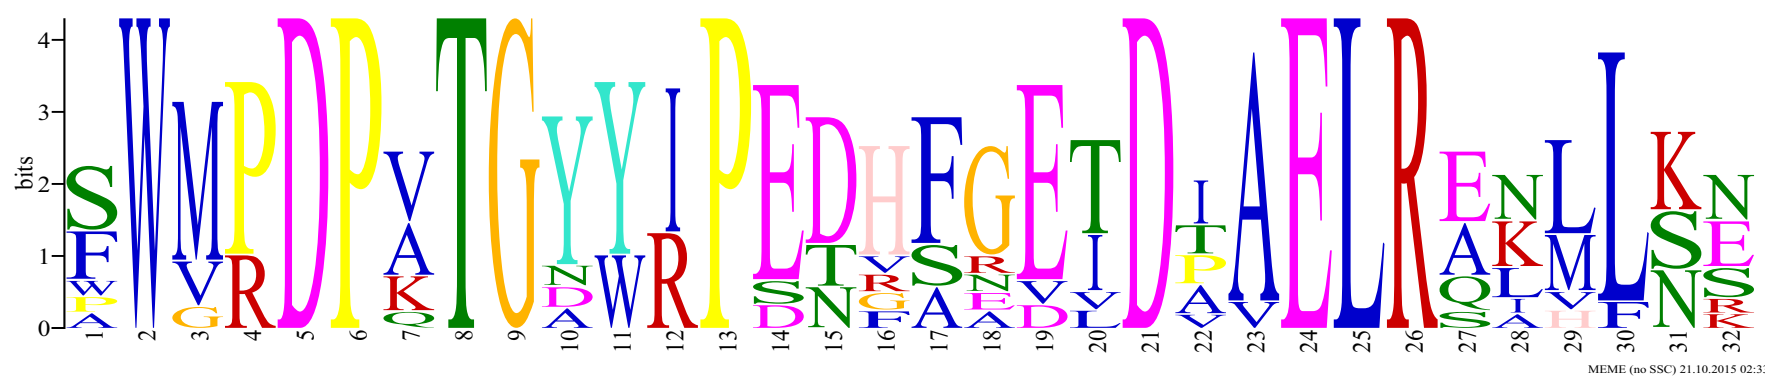

motif 5

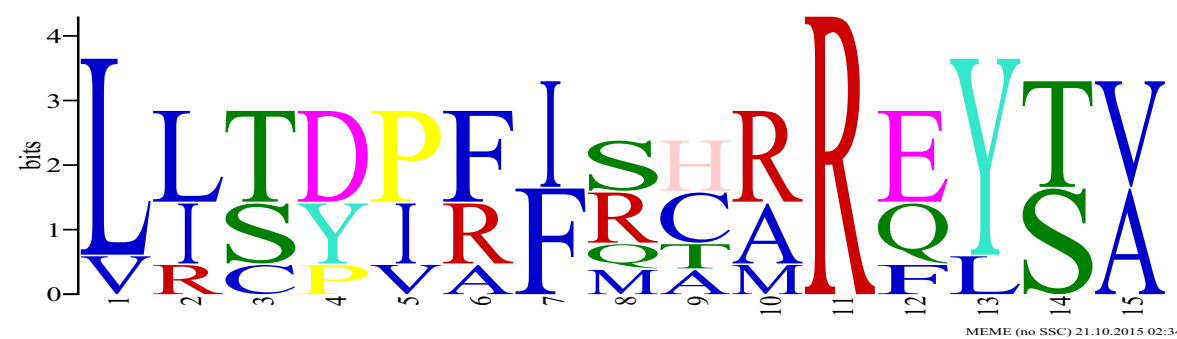

motif 6

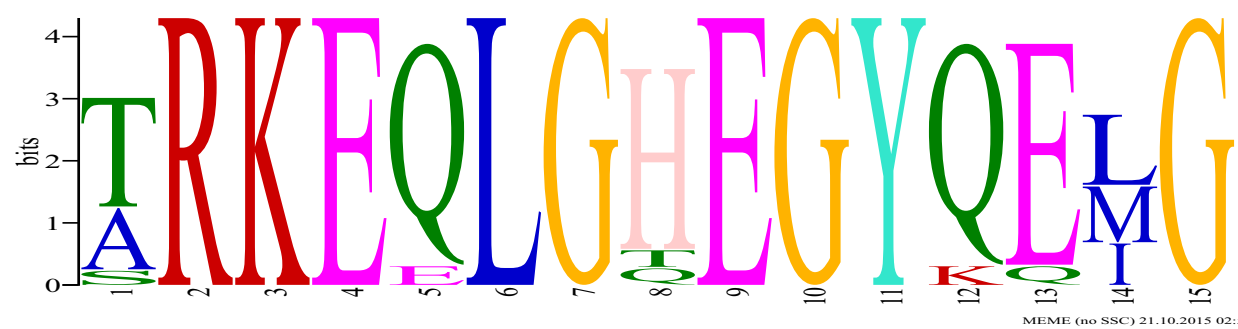

motif S

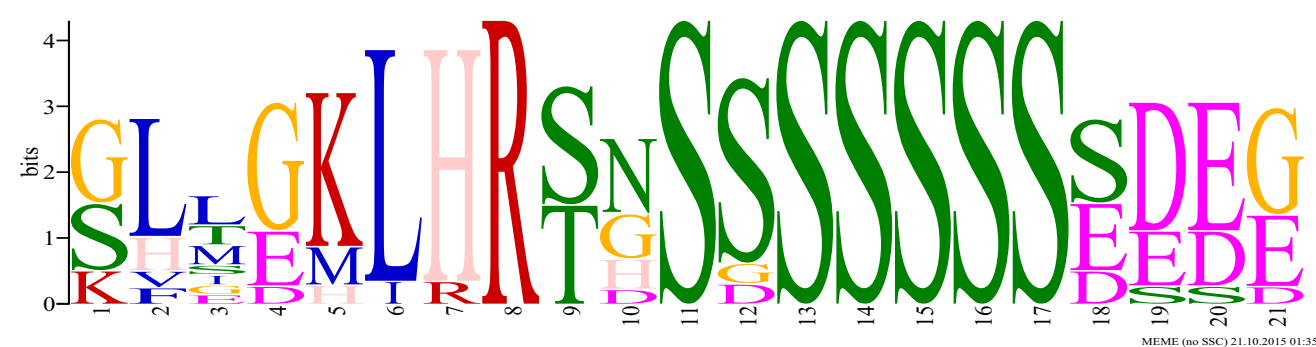

motif K

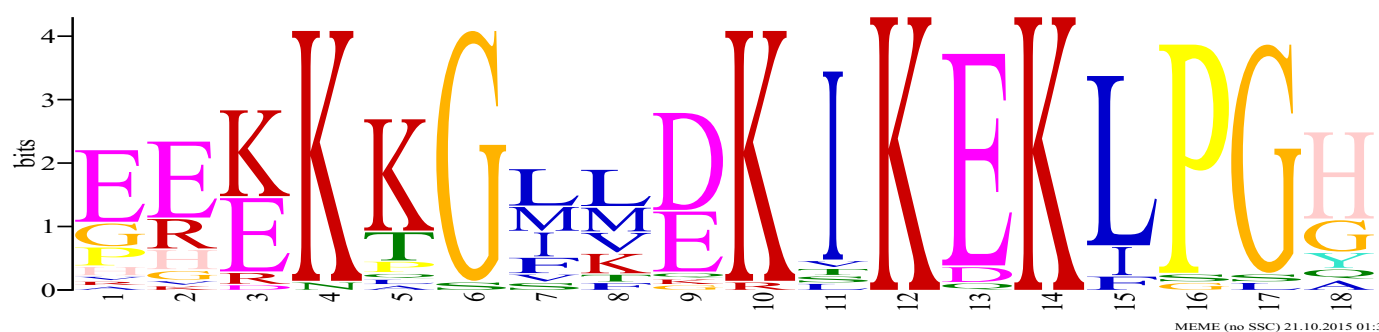

motif 9

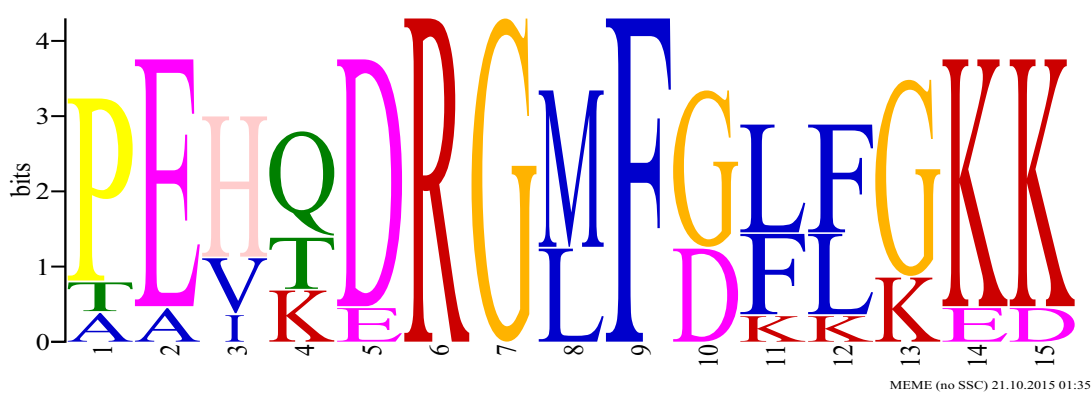

motif 10

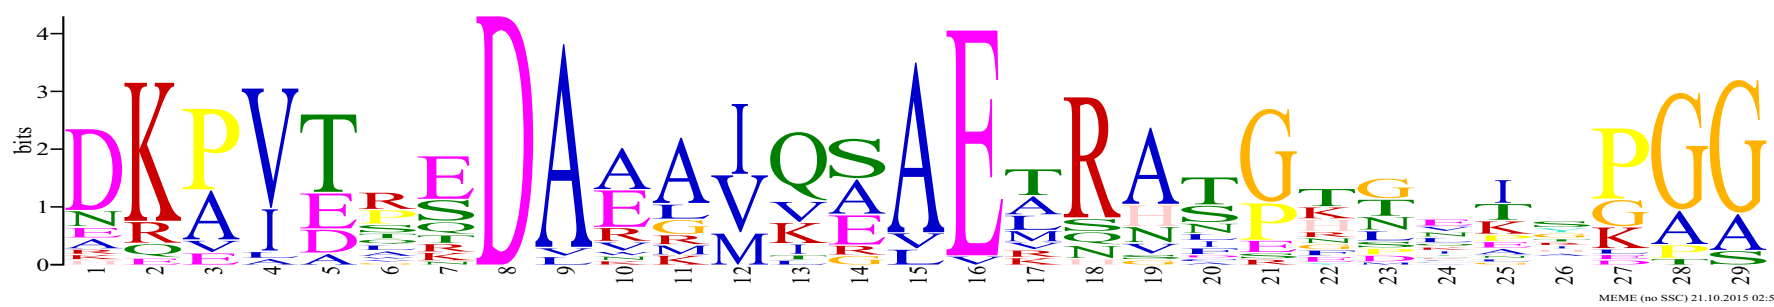

motif 11

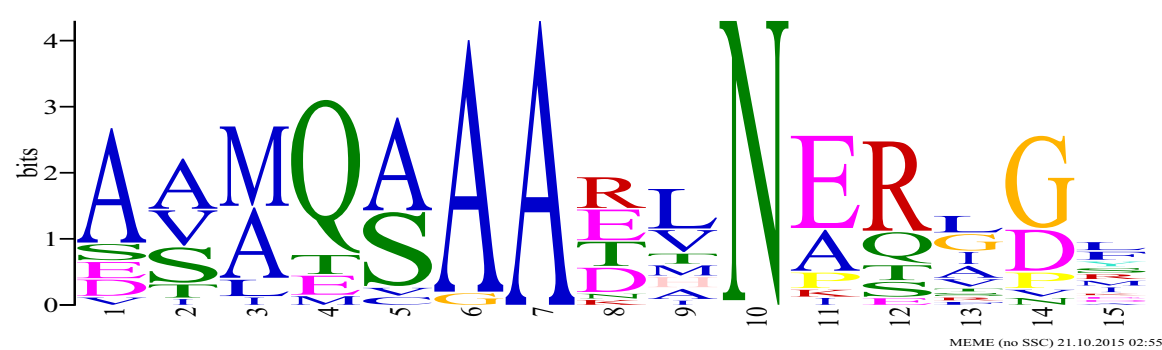

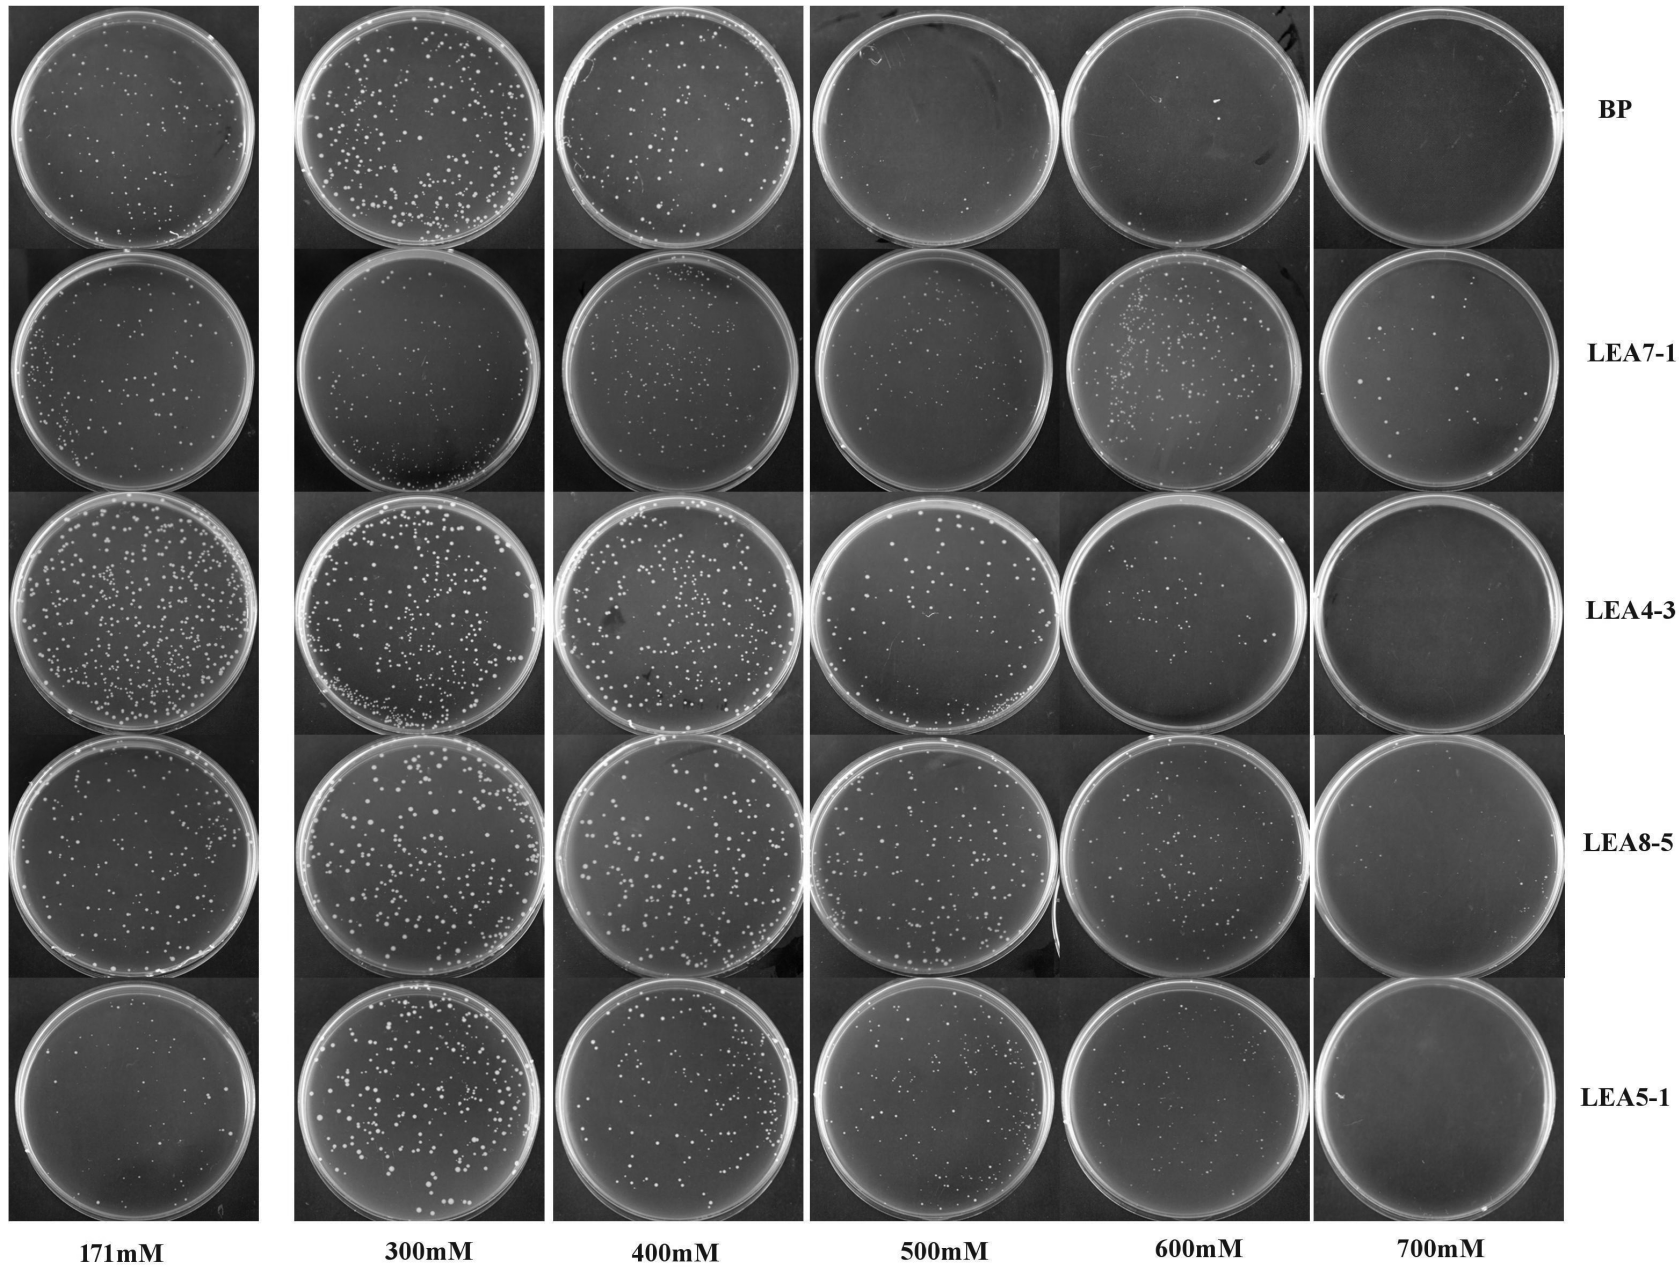

171mM

300mM

400mM

500mM

600mM

700mM

BP

LEA7-1

LEA4-3

LEA8-5

LEA5-1

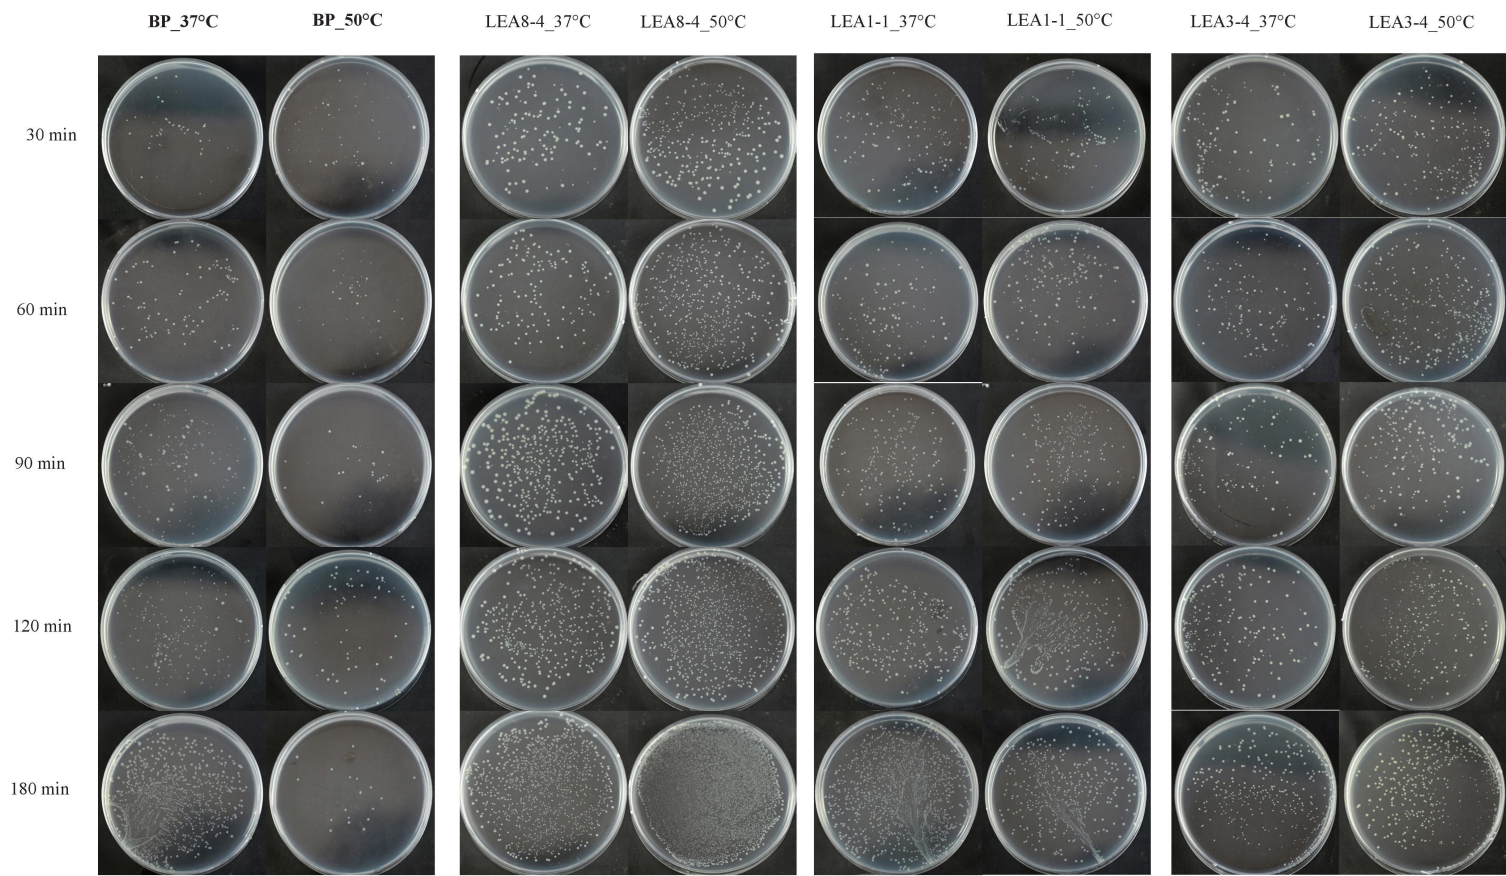

**Supplemental Table1. Primers used to clone the *LEA* genes.**

| Genes            | Primer name         | Sequence (5'-3')          |
|------------------|---------------------|---------------------------|
| <i>PtaLEA1-1</i> | <i>PtaRT-LEA1-1</i> | GCAGCCAAGGAGAAGATGAGC     |
|                  | <i>PtaRT-LEA1-1</i> | GGGATAAGTGGTAGTGTGAGTAGGG |
| <i>PtaLEA1-2</i> | <i>PtaRT-LEA1-2</i> | AGCGATGTGAAGGAAGGGAT      |
|                  | <i>PtaRT-LEA1-2</i> | GTAAGTCCAGGAGTACCAACATTC  |
| <i>PtaLEA2-1</i> | <i>PtaRT-LEA2-1</i> | TATCAAGCCCGAAGCATTATC     |
|                  | <i>PtaRT-LEA2-1</i> | ATGGGTCCAAATGGAGAGTCAAC   |
| <i>PtaLEA3-1</i> | <i>PtaRT-LEA3-1</i> | ATGGCCAGATCTCTGCCC        |
|                  | <i>PtaRT-LEA3-1</i> | TGCTACATCAGTTACCCCAAAA    |
| <i>PtaLEA3-2</i> | <i>PtaRT-LEA3-2</i> | ATAATTTTCAATGGCTGCCG      |
|                  | <i>PtaRT-LEA3-2</i> | AATTGAGAAATTTTACATCAATTCA |
| <i>PtaLEA3-3</i> | <i>PtaRT-LEA3-3</i> | TCTACATATGAAGGTTGTGGCTG   |
|                  | <i>PtaRT-LEA3-3</i> | CAGAAATTTTAAATCGTGTCGTT   |
| <i>PtaLEA3-4</i> | <i>PtaRT-LEA3-4</i> | CTCCGAATAAGTTATCTTCTCTCAG |
|                  | <i>PtaRT-LEA3-4</i> | TCCGAGTCCGCAATGTC         |
| <i>PtaLEA3-5</i> | <i>PtaRT-LEA3-5</i> | TGGTCTTGTGTCCCGTTTTTC     |
|                  | <i>PtaRT-LEA3-5</i> | TTCTGGAGGAGAGCAGCTTC      |
| <i>PtaLEA3-6</i> | <i>PtaRT-LEA3-6</i> | ATGGCAGGACGGCTTCTAT       |
|                  | <i>PtaRT-LEA3-6</i> | CTACTTTCTAGATAGGAGCTTCTGC |
| <i>PtaLEA4-1</i> | <i>PtaRT-LEA4-1</i> | CGGACCAGTACAATCGGG        |
|                  | <i>PtaRT-LEA4-1</i> | CCCAAGGGATGCTTCAGAG       |
| <i>PtaLEA4-2</i> | <i>PtaRT-LEA4-2</i> | CAGTGCAAGCAATATGGGC       |
|                  | <i>PtaRT-LEA4-2</i> | CCAAAGGGTTTCTTGACAGC      |
| <i>PtaLEA4-3</i> | <i>PtaRT-LEA4-3</i> | GAGGCAGAAGAGAGACGGG       |
|                  | <i>PtaRT-LEA4-3</i> | GGACTCTGGGCTTTTCTTG       |
| <i>PtaLEA5-1</i> | <i>PtaRT-LEA5-1</i> | CTAAATCGTTGGGAGTGACCA     |
|                  | <i>PtaRT-LEA5-1</i> | CCGTTCTTCTTTTCTTACTTCTCC  |
| <i>PtaLEA7-1</i> | <i>PtaRT-LEA7-1</i> | ATGAAGCGCAAGATCAATTG      |
|                  | <i>PtaRT-LEA7-1</i> | AGGCAGGTCTTCGGTAGCAGTA    |
| <i>PtaLEA7-2</i> | <i>PtaRT-LEA7-2</i> | TATTTTTCAGGGTTTCATACGAC   |
|                  | <i>PtaRT-LEA7-2</i> | CCTCCTTTTTGAGTGACGG       |
| <i>PtaLEA7-3</i> | <i>PtaRT-LEA7-3</i> | AGACTCAGAAGGGTGGTGCT      |
|                  | <i>PtaRT-LEA7-3</i> | TGGTGTGGAAACCCATAGC       |
| <i>PtaLEA7-4</i> | <i>PtaRT-LEA7-4</i> | AACGTCCTTACGGAAAGCG       |
|                  | <i>PtaRT-LEA7-4</i> | CCACGAGCAGGTCTTCAGTAG     |
| <i>PtaLEA8-1</i> | <i>PtaRT-LEA8-1</i> | CATCTGCAGAGACTGTGCCT      |
|                  | <i>PtaRT-LEA8-1</i> | CCTTCATATCCATGCCCAT       |
| <i>PtaLEA8-2</i> | <i>PtaRT-LEA8-2</i> | CAATCTGATCACATTGTCCAGAC   |
|                  | <i>PtaRT-LEA8-2</i> | GGAATACTGCTTTCCATCCTC     |
| <i>PtaLEA8-3</i> | <i>PtaRT-LEA8-3</i> | GGAGTCGAACACGGGCAT        |
|                  | <i>PtaRT-LEA8-3</i> | CTTTGATTTTACCAAGCACACC    |
| <i>PtaLEA8-4</i> | <i>PtaRT-LEA8-4</i> | ATGGCTGAACAAGCTAAGCAA     |
|                  | <i>PtaRT-LEA8-4</i> | CGCCTTCTTCTCCTTTCAC       |

|                  |                     |                           |
|------------------|---------------------|---------------------------|
| <i>PtaLEA8-5</i> | <i>PtaRT-LEA8-5</i> | ATGGCGCAACCAGCACAC        |
|                  | <i>PtaRT-LEA8-5</i> | TTACTCCACGTCATTCTTATTTTGT |
| <i>PtaLEA8-6</i> | <i>PtaRT-LEA8-6</i> | GAAAGCATTCTGATGAGATTGG    |
|                  | <i>PtaRT-LEA8-6</i> | TTATTTTATCAAGCATACCCGT    |

---

**Supplemental Table 2. RT-PCR primers used to detect the expression of *LEA* genes.**

| Genes            | Primer name         | Sequence (5'-3')          |
|------------------|---------------------|---------------------------|
| <i>PtaLEA1-1</i> | <i>PtaRT-LEA1-1</i> | GCAGCCAAGGAGAAGATGAGC     |
|                  | <i>PtaRT-LEA1-1</i> | GGGATAAGTGGTAGTGTGAGTAGGG |
| <i>PtaLEA1-2</i> | <i>PtaRT-LEA1-2</i> | AGCGATGTGAAGGAAGGGAT      |
|                  | <i>PtaRT-LEA1-2</i> | GTAAGTTCCAGGAGTACCAACATTC |
| <i>PtaLEA2-1</i> | <i>PtaRT-LEA2-1</i> | TATCAAGCCCGGAAGCATTATC    |
|                  | <i>PtaRT-LEA2-1</i> | ATGGGTCCAAATGGAGAGTCAAC   |
| <i>PtaLEA3-1</i> | <i>PtaRT-LEA3-1</i> | ATGGCCAGATCTCTGCCC        |
|                  | <i>PtaRT-LEA3-1</i> | TGCTACATCAGTTACCCCAAAA    |
| <i>PtaLEA3-2</i> | <i>PtaRT-LEA3-2</i> | ATAATTTTCAATGGCTGCCG      |
|                  | <i>PtaRT-LEA3-2</i> | AATTGAGAAATTTTACATCAATTCA |
| <i>PtaLEA3-3</i> | <i>PtaRT-LEA3-3</i> | TCTACATATGAAGGTTGTGGCTG   |
|                  | <i>PtaRT-LEA3-3</i> | CAGAAATTTTAAATCGTGTGCGTT  |
| <i>PtaLEA3-4</i> | <i>PtaRT-LEA3-4</i> | CTCCGAATAAGTTATCTTCTCTCAG |
|                  | <i>PtaRT-LEA3-4</i> | TCGGAGTTCGGCAATGTC        |
| <i>PtaLEA3-5</i> | <i>PtaRT-LEA3-5</i> | TGGTCTTGTGTCCCGTTTTTC     |
|                  | <i>PtaRT-LEA3-5</i> | TTCTGGAGGAGAGCAGCTTC      |
| <i>PtaLEA3-6</i> | <i>PtaRT-LEA3-6</i> | ATGGCAGGACGGCTTCTAT       |
|                  | <i>PtaRT-LEA3-6</i> | CTACTTCTAGATAGGAGCTTCTGC  |
| <i>PtaLEA4-1</i> | <i>PtaRT-LEA4-1</i> | CGGACCAGTACAATCGGG        |
|                  | <i>PtaRT-LEA4-1</i> | CCCAAGGGATGCTTCAGAG       |
| <i>PtaLEA4-2</i> | <i>PtaRT-LEA4-2</i> | CAGTGCAAGCAATATGGGC       |
|                  | <i>PtaRT-LEA4-2</i> | CCAAAGGGTTTCTTGACAGC      |
| <i>PtaLEA4-3</i> | <i>PtaRT-LEA4-3</i> | GAGGCAGAAGAGAGACGGG       |
|                  | <i>PtaRT-LEA4-3</i> | GGACTCTTGGGCTTTTTCTTG     |
| <i>PtaLEA5-1</i> | <i>PtaRT-LEA5-1</i> | CTAAATCGTTGGGAGTGACCA     |
|                  | <i>PtaRT-LEA5-1</i> | CCGTCTTCTTTTCTTACTTCTCC   |
| <i>PtaLEA7-1</i> | <i>PtaRT-LEA7-1</i> | ATGAAGCGCAAGATCAATTG      |
|                  | <i>PtaRT-LEA7-1</i> | AGGCAGGTCTTCGGTAGCAGTA    |
| <i>PtaLEA7-2</i> | <i>PtaRT-LEA7-2</i> | TATTTTTTCAGGGTTTCATACGAC  |
|                  | <i>PtaRT-LEA7-2</i> | CCTCCTTTTTGAGTGACGG       |
| <i>PtaLEA7-3</i> | <i>PtaRT-LEA7-3</i> | AGACTCAGAAGGGTGGTGCT      |
|                  | <i>PtaRT-LEA7-3</i> | TGGTGTGGAAACCCATAGC       |
| <i>PtaLEA7-4</i> | <i>PtaRT-LEA7-4</i> | AACGTCCTTACGGAAAGCG       |
|                  | <i>PtaRT-LEA7-4</i> | CCACGAGCAGGTCTTCAGTAG     |
| <i>PtaLEA8-1</i> | <i>PtaRT-LEA8-1</i> | CATCTGCAGAGACTGTGCCT      |
|                  | <i>PtaRT-LEA8-1</i> | CCTTCATATCCATGCCCAT       |
| <i>PtaLEA8-2</i> | <i>PtaRT-LEA8-2</i> | CAATCTGATCACATTGTCCAGAC   |
|                  | <i>PtaRT-LEA8-2</i> | GGAATACTGCTTTCCATCCTC     |
| <i>PtaLEA8-3</i> | <i>PtaRT-LEA8-3</i> | GGAGTCGAACACGGGCAT        |
|                  | <i>PtaRT-LEA8-3</i> | CTTTGATTTTACCAAGCACACC    |
| <i>PtaLEA8-4</i> | <i>PtaRT-LEA8-4</i> | ATGGCTGAACAAGCTAAGCAA     |
|                  | <i>PtaRT-LEA8-4</i> | CGCCTTCTTCTCTCTTCAC       |

|                  |                     |                           |
|------------------|---------------------|---------------------------|
| <i>PtaLEA8-5</i> | <i>PtaRT-LEA8-5</i> | ATGGCGCAACCAGCACAC        |
|                  | <i>PtaRT-LEA8-5</i> | TTACTCCACGTCATTCTTATTTTGT |
| <i>PtaLEA8-6</i> | <i>PtaRT-LEA8-6</i> | GAAAGCATTCTGATGAGATTGG    |
|                  | <i>PtaRT-LEA8-6</i> | TTATTTTATCAAGCATACCCGT    |

---



**Supplemental Table 3. EX-PCR primers used to expression the *P.tabliufrims* LEA genes.**

| <b>Genes</b>     | <b>Primer name</b>  | <b>Sequence (5'-3')</b>             |
|------------------|---------------------|-------------------------------------|
| <i>PtaLEA1-1</i> | <i>PtaEX-LEA1-1</i> | AGCGGCCGCATGCAACCTGTAAAGAATGCA      |
|                  | <i>PtaEX-LEA1-1</i> | T TACTAGTTATCATAAGTACTTGCCGGGAG     |
| <i>PtaLEA1-2</i> | <i>PtaEX-LEA1-2</i> | AGCGGCCGCATGCAGACGGCCAAGGAG         |
|                  | <i>PtaEX-LEA1-2</i> | T TACTAGTTATCACAGGTAATCTCTACCAGTGTG |
| <i>PtaLEA2-1</i> | <i>PtaEX-LEA2-1</i> | AGCGGCCGCATGACAATAATCTACGATGATATC   |
|                  | <i>PtaEX-LEA2-1</i> | T TACTAGTTATCAATACTCATCGTCCTCG      |
| <i>PtaLEA3-2</i> | <i>PtaEX-LEA3-2</i> | AGCGGCCGCATGGCTGCCGGTGCTCTG         |
|                  | <i>PtaEX-LEA3-2</i> | T TACTAGTTAATTTGGTCTCCGCGAGA        |
| <i>PtaLEA3-4</i> | <i>PtaEX-LEA3-4</i> | AGCGGCCGCATGGCAAAGCTTGCTCTCC        |
|                  | <i>PtaEX-LEA3-4</i> | T TACTAGTTATCAGGAGGAGGACCTTCG       |
| <i>PtaLEA4-2</i> | <i>PtaEX-LEA4-2</i> | AGCGGCCGCATGGCGGATCAGTGCAAG         |
|                  | <i>PtaEX-LEA4-2</i> | T TACTAGTTACTACTGATCGTACCACCAAAG    |
| <i>PtaLEA4-3</i> | <i>PtaEX-LEA4-3</i> | AGCGGCCGCATGGCTTCAGAACAGAAAAC       |
|                  | <i>PtaEX-LEA4-3</i> | T TACTAGTTATCACCCACGTCGTTGAAAG      |
| <i>PtaLEA5-1</i> | <i>PtaEX-LEA5-1</i> | AGCGGCCGCATGGAGGGATTGATAATGAAAAT    |
|                  | <i>PtaEX-LEA5-1</i> | T TACTAGTTAGTAGCCAAGCCTTTCCTTA      |
| <i>PtaLEA7-1</i> | <i>PtaEX-LEA7-1</i> | AGCGGCCGCATGAATCAGGGCAGGCG          |
|                  | <i>PtaEX-LEA7-1</i> | T TACTAGTTATCATGTCCGAAACCCCATG      |
| <i>PtaLEA7-3</i> | <i>PtaEX-LEA7-3</i> | AGCGGCCGCATGCAGAGTGCGGAGGCA         |
|                  | <i>PtaEX-LEA7-3</i> | T TACTAGTTACTTCTCCGAGTGGCTGTG       |
| <i>PtaLEA8-2</i> | <i>PtaEX-LEA8-2</i> | AGCGGCCGCATGGCGGAAGAAGCACCAG        |
|                  | <i>PtaEX-LEA8-2</i> | T TACTAGTTACTGTCCCATCATTCTTGTAT     |
| <i>PtaLEA8-4</i> | <i>PtaEX-LEA8-4</i> | AGCGGCCGCATGGCTGAACAAGCTAAGCA       |
|                  | <i>PtaEX-LEA8-4</i> | T TACTAGTTACTAGTGCCAGGCAGCTTCTC     |
| <i>PtaLEA8-5</i> | <i>PtaEX-LEA8-5</i> | AGCGGCCGCATGGCGCAACCAGCACAC         |
|                  | <i>PtaEX-LEA8-5</i> | T TACTAGTTACTCCACGTCATTCTATTTTGT    |
